# Supplementary material
Source: Springer Nature journal article supplement (https://www.springermedizin.de/resource/supplementary/12967_2011_956_MOESM2_ESM.pdf/9577284)

Vehicle

Conventional dose

High dose

CD31

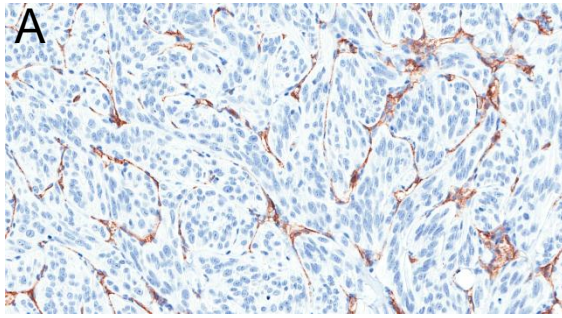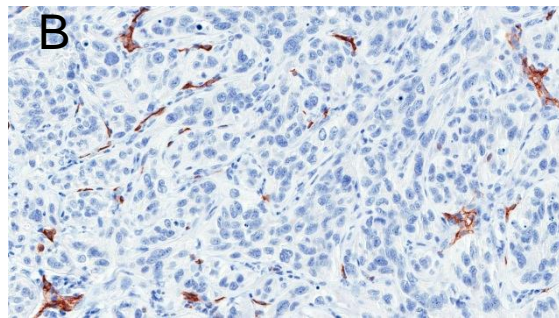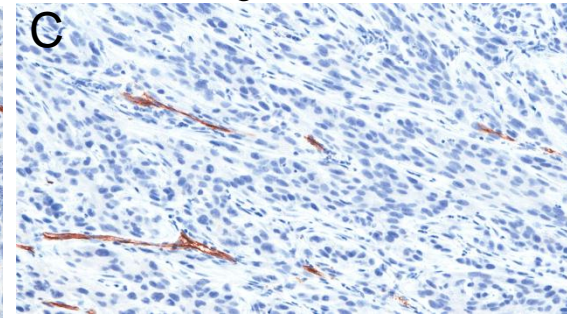

CD34

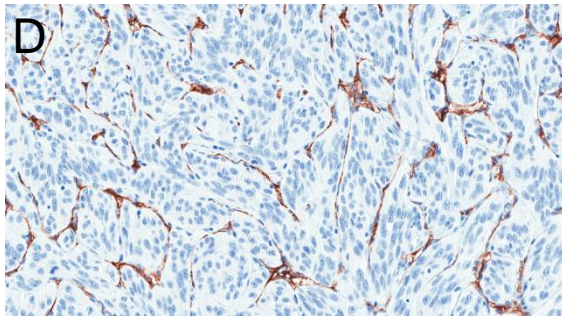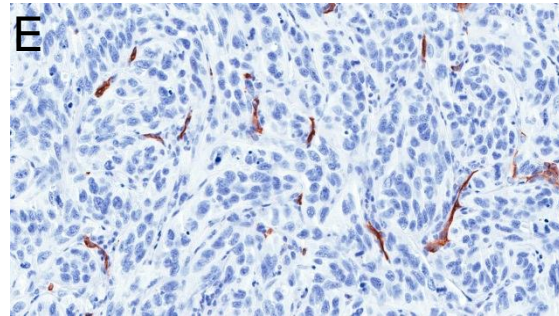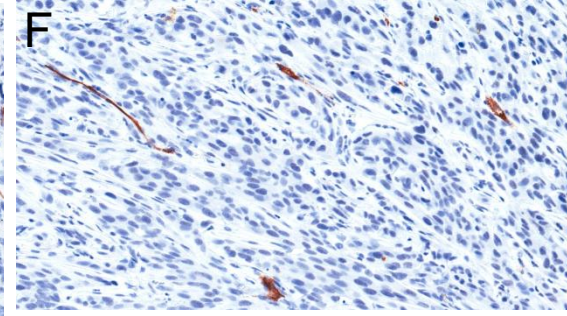Vessels per  $\mu\text{M}^2 \times 10,000$ 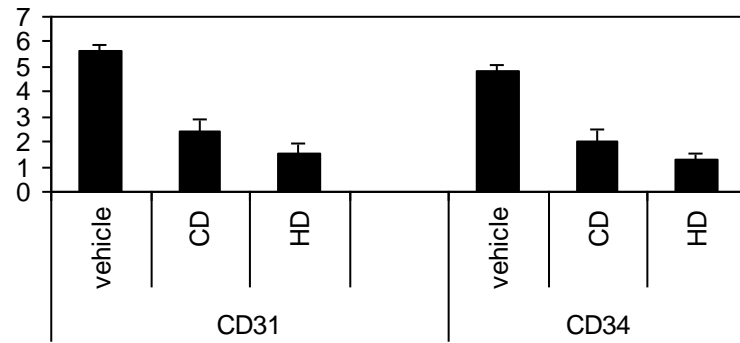

Supplement: MOESM2 [file 9577284]
